## Factors predicting organ-specific distant metastasis in patients with completely resected lung adenocarcinoma

Jung-Jyh Hung<sup>1</sup>, Wen-Juei Jeng<sup>2,3</sup>, Yu-Chung Wu<sup>1</sup>, Teh-Ying Chou<sup>3,4</sup>, Wen-Hu Hsu<sup>1</sup>

<sup>1</sup>Division of Thoracic Surgery, Department of Surgery, Taipei Veterans General Hospital and School of Medicine, National Yang-Ming University, Taipei, Taiwan

<sup>2</sup>Department of Internal Medicine, Chang Gung Memorial Hospital and School of Medicine, Chang Gung University, Taipei, Taiwan

<sup>3</sup>Institute of Clinical Medicine, National Yang-Ming University, Taipei, Taiwan

<sup>4</sup>Department of Pathology and Laboratory Medicine, Taipei Veterans General Hospital, Taipei, Taiwan

**Correspondence to:** Jung-Jyh Hung, **email:** bradley.hung@gmail.com  
Wen-Hu Hsu, **email:** whhsu@vghtpe.gov.tw

**Keywords:** lung adenocarcinoma, survival, organ sites of metastasis, histology, subtype

**Received:** November 07, 2015

**Accepted:** July 17, 2016

**Published:** August 17, 2016

### ABSTRACT

The aim of the study is to demonstrate the relationship between clinicopathological variables and organ sites of metastasis in resected lung adenocarcinoma. The clinicopathological characteristics of 748 patients of resected lung adenocarcinoma at Taipei Veterans General Hospital between 2004 and 2012 were retrospectively reviewed. The prognostic value of clinicopathological variables for specific organ site metastasis-free survival was demonstrated. Among the 182 patients with distant metastasis, 93 (51.1%) patients developed contralateral lung metastasis, 81 (44.5%) had brain metastasis, 71 (39.0%) had bone metastasis, and 18 (8.9%) had liver metastasis during follow-up. Acinar predominant (Hazard ratio [HR], 0.468; 95% confidence interval [CI]: 0.250 to 0.877;  $P = 0.018$ ) was significantly associated with less contralateral lung metastasis in multivariate analysis. Micropapillary predominant (HR, 2.686; 95% CI, 1.270 to 5.683;  $P = 0.010$ ) was significantly associated with brain metastasis. Acinar predominant (HR, 0.461; 95% CI, 0.216 to 0.986;  $P = 0.046$ ) was a significant prognostic factor for better contralateral lung metastasis-free survival in multivariate analysis. Micropapillary predominant (HR, 2.186; 95% CI, 1.148 to 4.163;  $P = 0.017$ ) and solid predominant (HR, 4.093; 95% CI, 1.340 to 12.504;  $P = 0.013$ ) were significant prognostic factors for worse brain metastasis-free survival and liver metastasis free-survival, respectively. There are significant differences in metastatic behavior between predominant pathological subtypes of lung adenocarcinoma. This information is important for patient follow-up strategy and identification of organ-specific distant metastasis. Prospective multi-institutional studies are mandatory for further validation.

### INTRODUCTION

Lung cancer is the main cause of cancer-related death worldwide [1]. Surgical resection is the treatment of choice for early-stage non-small cell lung cancer (NSCLC) [2]. Tumor recurrence after surgical resection is the most common cause of treatment failure [3–5]. Even with multimodality treatments, including chemotherapy, radiotherapy or a combination of other therapeutic modalities, most patients with recurrence after resection have little possibility of cure [3–5]. Identification of predictors for recurrence in patients with completely resected NSCLC is helpful for the use of adjuvant therapy or application of close follow-up strategy.

Organ tropism, also known as the seed-and-soil hypothesis, was first proposed by Stephen Paget in 1889 [6]. Solid tumors have great variation in patterns of metastatic organ tropism [7, 8]. A particular cancer will relapse in one particular organ or relapse in multiple specific organ sites [7, 8]. Many reports have demonstrated various predictors for organ-specific metastasis from solid tumors in the literature [9–11]. Association between breast cancer molecular subtypes and distinct pattern of metastasis has been reported [12–14]. The lung, brain and bone are the most common organ sites of metastasis in resected NSCLC [3–5, 15, 16]. In 2011, the International Association for the Study of Lung Cancer (IASLC), the American Thoracic Society (ATS), and the European

Respiratory Society (ERS) proposed a new classification system of lung adenocarcinoma [17]. They recommended the use of comprehensive histological subtyping to assess histologic patterns semiquantitatively in 5% increments to choose a single predominant pattern (lepidic, acinar, papillary, micropapillary or solid) for invasive adenocarcinomas [17]. The significant prognostic value of the new classification on death and recurrence in lung adenocarcinoma has been reported and validated in many studies [18–21].

In our previous studies [22, 23], we have demonstrated that patients with micropapillary/solid predominant lung adenocarcinoma had significantly worse prognosis. We have also demonstrated that patients with micropapillary or solid predominant adenocarcinoma had a significantly higher possibility of developing initial extrathoracic-only recurrence than other subtypes [23]. However, whether the new classification predicts organ-specific metastasis of resected lung adenocarcinoma has not been investigated and reported in the literature. The study aims to demonstrate the predictors of organ-specific metastasis, including the new lung adenocarcinoma classification, in patients with completely resected lung adenocarcinoma with distant metastasis.

## RESULTS

The median follow-up time for all the 748 patients was 33.6 months (range, 3.2 to 113.1 months). The median number of mediastinal lymph node dissection/sampling was 18.0 (mean,  $19.5 \pm 9.2$ ). The characteristics of these patients were listed in Table 1. For all patients, the 5-year overall survival and disease-free survival rates were 77.9% and 68.9%, respectively. Among the 182 patients with distant metastasis, there were 55 (30.2%) patients with acinar predominant, 43 (23.6%) with papillary predominant, 44 (24.2%) with micropapillary predominant, and 40 (22.0%) with solid predominant adenocarcinoma. The median time to recurrence for the 182 patients was 15.2 months (range,  $0.7 \pm 93.4$  months). Among the 182 patients, 93 (51.1%) patients developed contralateral lung metastasis, 81 (44.5%) had brain metastasis, 71 (39.0%) had bone metastasis, and 18 (8.9%) had liver metastasis during follow-up. Ninety-four (51.6%) of the 182 patients had local recurrence. For all 748 patients, the 2-year contralateral lung metastasis free-survival (CLMFS), brain metastasis free-survival (BrMFS), bone metastasis free-survival (BoMFS), and liver metastasis free-survival (LMFS) were 94.8%, 94.8%, 94.3%, and 98.5%, respectively.

### Association between organ sites of distant metastasis and clinicopathological variables

We first performed  $\chi^2$  test and the paired independent sample *t*-test to investigate the relationship

between specific organ sites of distant metastasis and clinicopathological variables (Table 2). Acinar subtype predominant ( $P = 0.005$ ) was associated with less contralateral lung metastasis. Micropapillary ( $P = 0.002$ ) and solid ( $P = 0.018$ ) subtype predominant were associated with more contralateral lung metastasis. Micropapillary ( $P < 0.001$ ) and solid ( $P = 0.024$ ) subtype predominant were associated with brain metastasis. Micropapillary ( $P = 0.012$ ) and solid ( $P < 0.001$ ) subtype predominant were also associated with bone metastasis. Solid subtype predominant ( $P < 0.001$ ) was associated with liver metastasis.

### Logistic regression analysis for organ sites of distant metastasis

We further performed univariate and multivariate logistic regression analyses for specific organ sites of distant metastasis (Table 3). Greater tumor size ( $P = 0.006$ ), N2 (vs. N0 or N1) ( $P = 0.046$ ), and stage II or III (vs. stage I) ( $P = 0.002$ ) were significantly associated with more contralateral lung metastasis in multivariate analysis. Acinar subtype predominant (Hazard ratio [HR], 0.468; 95% confidence interval [CI], 0.250 to 0.877;  $P = 0.018$ ) was significantly associated with less contralateral lung metastasis. Greater tumor size ( $P = 0.017$ ), stage II or III (vs. stage I) ( $P = 0.014$ ), angiolymphatic invasion ( $P = 0.037$ ), and micropapillary subtype predominant (HR, 2.686; 95% CI, 1.270 to 5.683;  $P = 0.010$ ) were significantly associated with more brain metastasis in multivariate analysis. Greater tumor size ( $P = 0.002$ ), N2 status (vs. N0 or N1) ( $P = 0.011$ ), and angiolymphatic invasion ( $P = 0.003$ ) were significantly associated with more bone metastasis in multivariate analysis. Angiolymphatic invasion ( $P = 0.031$ ) was significantly associated with more liver metastasis in multivariate analysis. Solid subtype predominant ( $P = 0.059$ ) showed a trend toward being significantly associated with more liver metastasis.

### Analysis of specific organ sites metastasis-free survival

In addition to univariate and multivariate logistic regression analyses, we performed univariate and multivariate analyses by Cox proportional hazards model to further demonstrate the prognostic factors for specific organ sites metastasis-free survival. Greater tumor size (HR, 1.293; 95% CI, 1.061 to 1.576;  $P = 0.011$ ) was a significant prognostic factor for worse CLMFS, while acinar subtype predominant (HR, 0.461; 95% CI, 0.216 to 0.986;  $P = 0.046$ ) was a significantly prognostic factor for better CLMFS in multivariate analysis (Table 4 and Figure 1A). For BrMFS, angiolymphatic invasion (HR, 2.632; 95% CI, 1.420 to 4.879;  $P = 0.002$ ) and micropapillary subtype predominant (HR, 2.186; 95%

**Table 1: Clinicopathological variables of patients with resected lung adenocarcinoma**

| Variables                           | All Patients (n = 748) | Status of Distant Metastasis |               |         |
|-------------------------------------|------------------------|------------------------------|---------------|---------|
|                                     |                        | No (n = 566)                 | Yes (n = 182) | P value |
| Age, years (mean ± SD)              | 63.2 ± 11.1            | 62.8 ± 11.3                  | 64.2 ± 10.7   | 0.136   |
| Sex, no. (%)                        |                        |                              |               |         |
| Male                                | 361 (48.3)             | 269 (47.5)                   | 92 (50.5)     | 0.478   |
| Female                              | 387 (51.7)             | 297 (52.5)                   | 90 (49.5)     |         |
| Tumor size, cm (mean ± SD)          | 2.6 ± 1.3              | 2.6 ± 1.1                    | 3.5 ± 1.5     | < 0.001 |
| T status, no. (%)                   |                        |                              |               |         |
| T1a                                 | 168 (22.5)             | 158 (27.9)                   | 10 (5.5)      | < 0.001 |
| T1b                                 | 82 (11.0)              | 69 (12.2)                    | 13 (7.2)      |         |
| T2a                                 | 427 (57.1)             | 307 (54.2)                   | 120 (65.9)    |         |
| T2b                                 | 14 (1.8)               | 6 (1.1)                      | 8 (4.4)       |         |
| T3                                  | 44 (5.9)               | 21 (3.7)                     | 23 (12.6)     |         |
| T4                                  | 13 (1.7)               | 5 (0.9)                      | 8 (4.4)       |         |
| N status, no. (%)                   |                        |                              |               |         |
| N0                                  | 598 (79.9)             | 522 (92.2)                   | 76 (41.8)     | < 0.001 |
| N1                                  | 59 (7.9)               | 22 (3.9)                     | 37 (20.3)     |         |
| N2                                  | 91 (12.2)              | 22 (3.9)                     | 69 (37.9)     |         |
| Stage, no. (%)                      |                        |                              |               |         |
| IA                                  | 226 (30.3)             | 218 (38.5)                   | 8 (4.4)       | < 0.001 |
| IB                                  | 330 (44.1)             | 277 (48.9)                   | 53 (29.2)     |         |
| IIA                                 | 53 (7.1)               | 22 (3.9)                     | 31 (17.0)     |         |
| IIB                                 | 29 (3.9)               | 18 (3.2)                     | 11 (6.0)      |         |
| IIIA                                | 107 (14.3)             | 31 (5.5)                     | 76 (41.8)     |         |
| IIIB                                | 3 (0.3)                | 0 (0.0)                      | 3 (1.6)       |         |
| Visceral pleural invasion, no. (%)* |                        |                              |               |         |
| Absent                              | 293 (39.2)             | 249 (44.0)                   | 44 (24.2)     | < 0.001 |
| Present                             | 437 (58.4)             | 304 (53.7)                   | 133 (73.1)    |         |
| Unknown                             | 18 (2.4)               | 13 (2.3)                     | 5 (2.7)       |         |
| Angiolymphatic invasion, no. (%)*   |                        |                              |               |         |
| Absent                              | 517 (69.1)             | 440 (77.8)                   | 77 (42.3)     | < 0.001 |
| Present                             | 193 (25.8)             | 96 (17.0)                    | 97 (53.3)     |         |
| Unknown                             | 38 (5.1)               | 30 (5.2)                     | 8 (4.4)       |         |
| Predominant pattern, no. (%)        |                        |                              |               |         |
| Lepidic predominant                 | 74 (9.9)               | 74 (13.1)                    | 0 (0.0)       | < 0.001 |
| Acinar predominant                  | 302 (40.4)             | 247 (43.6)                   | 55 (30.2)     |         |
| Papillary predominant               | 184 (24.6)             | 141 (24.9)                   | 43 (23.6)     |         |
| Micropapillary predominant          | 105 (14.0)             | 61 (10.8)                    | 44 (24.2)     |         |
| Solid predominant                   | 83 (11.1)              | 43 (7.6)                     | 40 (22.0)     |         |
| Adjuvant therapy, no. (%)           |                        |                              |               |         |
| No                                  | 461 (61.6)             | 392 (69.3)                   | 69 (37.9)     | < 0.001 |
| Yes                                 | 287 (38.4)             | 174 (30.7)                   | 113 (62.1)    |         |

SD, Standard deviation. \*Patients with unknown status were excluded in the analysis.

**Table 2: Relationship between organ site of distant metastasis and clinicopathological variables in patients of resected lung adenocarcinoma**

| Variables                           | Contralateral Lung Metastasis |                 |         | Brain Metastasis |                 |         | Bone Metastasis |                 |         | Liver Metastasis |                 |         |
|-------------------------------------|-------------------------------|-----------------|---------|------------------|-----------------|---------|-----------------|-----------------|---------|------------------|-----------------|---------|
|                                     | No<br>(n = 655)               | Yes<br>(n = 93) | P value | No<br>(n = 667)  | Yes<br>(n = 81) | P value | No<br>(n = 677) | Yes<br>(n = 71) | P value | No<br>(n = 730)  | Yes<br>(n = 18) | P value |
| Age, years<br>(mean ± SD)           | 63.0 ± 11.2                   | 64.5 ± 11.0     | 0.223   | 63.3 ± 11.2      | 61.7 ± 10.4     | 0.211   | 63.1 ± 10.6     | 63.6 ± 10.9     | 0.715   | 63.2 ± 11.1      | 62.1 ± 14.5     | 0.682   |
| Sex, no. (%)                        |                               |                 |         |                  |                 |         |                 |                 |         |                  |                 |         |
| Male                                | 310 (47.3)                    | 51 (54.8)       | 0.175   | 322 (48.3)       | 39 (48.1)       | 0.983   | 320 (47.3)      | 41 (57.7)       | 0.093   | 349 (97.8)       | 12 (66.7)       | 0.114   |
| Female                              | 345 (52.7)                    | 42 (45.2)       |         | 345 (51.7)       | 42 (51.9)       |         | 357 (52.7)      | 30 (42.3)       |         | 381 (52.2)       | 6 (33.3)        |         |
| Tumor size,<br>cm (mean ± SD)       | 2.4 ± 1.2                     | 3.5 ± 1.6       | < 0.001 | 2.5 ± 1.3        | 3.5 ± 1.5       | < 0.001 | 2.4 ± 1.3       | 3.7 ± 1.4       | < 0.001 | 2.5 ± 1.3        | 3.8 ± 1.5       | < 0.001 |
| N status, no. (%)                   |                               |                 |         |                  |                 |         |                 |                 |         |                  |                 |         |
| N0 or N1                            | 597 (91.1)                    | 60 (64.5)       | < 0.001 | 604 (90.6)       | 53 (65.4)       | < 0.001 | 615 (90.8)      | 42 (59.2)       | < 0.001 | 647 (88.6)       | 10 (55.6)       | < 0.001 |
| N2                                  | 58 (8.9)                      | 33 (35.5)       |         | 63 (9.4)         | 28 (34.6)       |         | 62 (9.2)        | 29 (40.8)       |         | 83 (11.4)        | 8 (44.4)        |         |
| TNM stage, no. (%)                  |                               |                 |         |                  |                 |         |                 |                 |         |                  |                 |         |
| I                                   | 522 (79.7)                    | 34 (36.6)       | < 0.001 | 528 (79.2)       | 28 (34.6)       | < 0.001 | 530 (78.3)      | 26 (36.6)       | < 0.001 | 550 (75.3)       | 6 (33.3)        | < 0.001 |
| II or III                           | 133 (20.3)                    | 59 (63.4)       |         | 139 (20.8)       | 53 (65.4)       |         | 147 (21.7)      | 45 (63.4)       |         | 180 (24.7)       | 12 (66.7)       |         |
| Visceral pleural invasion, no. (%)* |                               |                 |         |                  |                 |         |                 |                 |         |                  |                 |         |
| Absent                              | 273 (42.8)                    | 20 (21.7)       | < 0.001 | 273 (41.9)       | 20 (25.3)       | 0.004   | 277 (41.9)      | 16 (23.2)       | 0.003   | 289 (40.5)       | 4 (23.5)        | 0.158   |
| Present                             | 365 (57.2)                    | 72 (78.3)       |         | 378 (58.1)       | 59 (74.7)       |         | 384 (58.1)      | 53 (76.8)       |         | 424 (59.5)       | 13 (76.5)       |         |
| Angiolymphatic invasion, no. (%)*   |                               |                 |         |                  |                 |         |                 |                 |         |                  |                 |         |
| Absent                              | 474 (76.3)                    | 43 (48.3)       | < 0.001 | 483 (76.4)       | 34 (43.6)       | < 0.001 | 491 (76.5)      | 26 (38.2)       | < 0.001 | 512 (73.9)       | 5 (29.4)        | < 0.001 |
| Present                             | 147 (23.7)                    | 46 (51.7)       |         | 149 (23.6)       | 44 (56.4)       |         | 151 (23.5)      | 42 (61.8)       |         | 181 (26.1)       | 12 (70.6)       |         |
| Acinar predominant, no. (%)         |                               |                 |         |                  |                 |         |                 |                 |         |                  |                 |         |
| No                                  | 378 (57.7)                    | 68 (73.1)       | 0.005   | 388 (58.2)       | 58 (71.6)       | 0.284   | 397 (58.6)      | 49 (69.0)       | 0.090   | 433 (59.3)       | 13 (72.2)       | 0.270   |
| Yes                                 | 277 (42.3)                    | 25 (26.9)       |         | 279 (41.8)       | 23 (28.4)       |         | 280 (41.4)      | 22 (31.0)       |         | 297 (40.7)       | 5 (27.8)        |         |
| Papillary predominant, no. (%)      |                               |                 |         |                  |                 |         |                 |                 |         |                  |                 |         |
| No                                  | 499 (76.2)                    | 65 (69.9)       | 0.187   | 499 (74.8)       | 65 (80.2)       | 0.284   | 507 (74.9)      | 57 (80.3)       | 0.316   | 548 (75.1)       | 16 (88.9)       | 0.179   |
| Yes                                 | 156 (23.8)                    | 28 (30.1)       |         | 168 (25.2)       | 16 (19.8)       |         | 170 (25.1)      | 14 (19.7)       |         | 182 (24.9)       | 2 (11.1)        |         |
| Micropapillary predominant, no. (%) |                               |                 |         |                  |                 |         |                 |                 |         |                  |                 |         |
| No                                  | 573 (87.5)                    | 70 (75.3)       | 0.002   | 589 (88.3)       | 54 (66.7)       | < 0.001 | 589 (87.0)      | 54 (76.1)       | 0.012   | 628 (86.0)       | 15 (83.3)       | 0.745   |
| Yes                                 | 82 (12.5)                     | 23 (24.7)       |         | 78 (11.7)        | 27 (33.3)       |         | 88 (13.0)       | 17 (23.9)       |         | 102 (14.0)       | 3 (16.7)        |         |
| Solid predominant, no. (%)          |                               |                 |         |                  |                 |         |                 |                 |         |                  |                 |         |
| No                                  | 589 (89.9)                    | 76 (81.7)       | 0.018   | 599 (89.8)       | 66 (81.5)       | 0.024   | 612 (90.4)      | 53 (74.6)       | < 0.001 | 655 (89.7)       | 10 (55.6)       | < 0.001 |
| Yes                                 | 66 (10.1)                     | 17 (18.3)       |         | 68 (10.2)        | 15 (18.5)       |         | 65 (9.6)        | 18 (25.4)       |         | 75 (10.3)        | 8 (44.4)        |         |

SD, Standard deviation. \*Patients with unknown status were excluded in the analysis.

CI, 1.148 to 4.163;  $P = 0.017$ ) were significantly worse prognostic factors in multivariate analysis (Figure 1B). For BoMFS, female was a significantly better prognostic factor (HR, 0.571; 95% CI, 0.329 to 0.990;  $P = 0.046$ ). Greater tumor size (HR, 1.268; 95% CI, 1.071 to 1.501;

$P = 0.006$ ) and angiolymphatic invasion (HR, 2.993; 95% CI, 1.642 to 5.454;  $P < 0.001$ ) were significantly worse prognostic factors in multivariate analysis. For LMFS, angiolymphatic invasion (HR, 3.699; 95% CI, 1.117 to 12.246;  $P = 0.032$ ) and solid subtype predominant

**Table 3: Univariate and multivariate analyses of association between clinicopathological variables and organ sites of metastasis in patients of resected lung adenocarcinoma**

| Variables                            | Univariate |                 |         | Multivariate |                 |         |
|--------------------------------------|------------|-----------------|---------|--------------|-----------------|---------|
|                                      | HR         | 95% CI          | P value | HR           | 95% CI          | P value |
| <b>Contralateral lung metastasis</b> |            |                 |         |              |                 |         |
| Age*                                 | 1.012      | 0.993 to 1.032  | 0.223   | 1.007        | 0.984 to 1.031  | 0.557   |
| Female                               | 0.740      | 0.478 to 1.145  | 0.176   | 0.836        | 0.502 to 1.393  | 0.493   |
| Tumor size†                          | 1.681      | 1.446 to 1.953  | < 0.001 | 1.306        | 1.081 to 1.579  | 0.006   |
| N2 (vs. N0 or N1)                    | 5.661      | 3.423 to 9.363  | < 0.001 | 2.000        | 1.013 to 3.948  | 0.046   |
| Stage II or III (vs. stage I)        | 6.811      | 4.287 to 10.821 | < 0.001 | 3.034        | 1.519 to 6.059  | 0.002   |
| Visceral pleural invasion            | 2.693      | 1.601 to 4.527  | < 0.001 | 1.704        | 0.951 to 3.053  | 0.073   |
| Angiolymphatic invasion              | 3.449      | 2.188 to 5.437  | < 0.001 | 1.411        | 0.819 to 2.433  | 0.215   |
| Acinar predominant                   | 0.502      | 0.309 to 0.814  | 0.005   | 0.468        | 0.250 to 0.877  | 0.018   |
| Papillary predominant                | 1.378      | 0.854 to 2.223  | 0.189   |              |                 |         |
| Micropapillary predominant           | 2.296      | 1.358 to 3.881  | 0.002   | 0.868        | 0.425 to 1.775  | 0.699   |
| Solid predominant                    | 1.996      | 1.113 to 3.580  | 0.020   | 0.633        | 0.281 to 1.429  | 0.271   |
| <b>Brain metastasis</b>              |            |                 |         |              |                 |         |
| Age*                                 | 0.987      | 0.967 to 1.007  | 0.211   | 0.985        | 0.961 to 1.010  | 0.230   |
| Female                               | 1.005      | 0.634 to 1.595  | 0.983   | 0.917        | 0.537 to 1.566  | 0.751   |
| Tumor size†                          | 1.593      | 1.367 to 1.856  | < 0.001 | 1.276        | 1.045 to 1.559  | 0.017   |
| N2 (vs. N0 or N1)                    | 5.065      | 2.992 to 8.573  | < 0.001 | 1.657        | 0.821 to 3.347  | 0.159   |
| Stage II or III (vs. stage I)        | 7.190      | 4.385 to 11.790 | < 0.001 | 2.469        | 1.201 to 5.076  | 0.014   |
| Visceral pleural invasion            | 2.131      | 1.253 to 3.621  | 0.005   | 1.179        | 0.650 to 2.136  | 0.588   |
| Angiolymphatic invasion              | 4.195      | 2.586 to 6.805  | < 0.001 | 1.818        | 1.037 to 3.189  | 0.037   |
| Acinar predominant                   | 0.551      | 0.332 to 0.916  | 0.021   | 1.009        | 0.497 to 2.046  | 0.980   |
| Papillary predominant                | 0.731      | 0.412 to 1.298  | 0.285   |              |                 |         |
| Micropapillary predominant           | 3.776      | 2.247 to 6.343  | < 0.001 | 2.686        | 1.270 to 5.683  | 0.010   |
| Solid predominant                    | 2.002      | 1.083 to 3.700  | 0.027   | 1.284        | 0.530 to 3.112  | 0.579   |
| <b>Bone metastasis</b>               |            |                 |         |              |                 |         |
| Age *                                | 1.004      | 0.982 to 1.026  | 0.715   | 0.995        | 0.969 to 1.022  | 0.726   |
| Female                               | 0.656      | 0.400 to 1.075  | 0.095   | 0.667        | 0.374 to 1.188  | 0.169   |
| Tumor size†                          | 1.762      | 1.496 to 2.075  | < 0.001 | 1.388        | 1.127 to 1.710  | 0.002   |
| N2 (vs. N0 or N1)                    | 6.849      | 3.989 to 11.759 | < 0.001 | 2.727        | 1.259 to 5.910  | 0.011   |
| Stage II or III (vs. stage I)        | 6.240      | 3.724 to 10.457 | < 0.001 | 1.481        | 0.653 to 3.356  | 0.347   |
| Visceral pleural invasion            | 2.389      | 1.338 to 4.268  | 0.003   | 1.305        | 0.685 to 2.487  | 0.418   |
| Angiolymphatic invasion              | 5.253      | 3.117 to 8.853  | < 0.001 | 2.447        | 1.347 to 4.446  | 0.003   |
| Acinar predominant                   | 0.637      | 0.376 to 1.077  | 0.092   | 0.995        | 0.472 to 2.097  | 0.990   |
| Papillary predominant                | 0.733      | 0.398 to 1.348  | 0.317   |              |                 |         |
| Micropapillary predominant           | 2.107      | 1.169 to 3.799  | 0.013   | 1.459        | 0.627 to 3.391  | 0.380   |
| Solid predominant                    | 3.198      | 1.768 to 5.784  | < 0.001 | 1.588        | 0.664 to 3.800  | 0.299   |
| <b>Liver metastasis</b>              |            |                 |         |              |                 |         |
| Age*                                 | 0.991      | 0.951 to 1.034  | 0.682   | 0.985        | 0.939 to 1.033  | 0.527   |
| Female                               | 0.458      | 0.170 to 1.233  | 0.122   | 0.550        | 0.187 to 1.617  | 0.277   |
| Tumor size†                          | 1.586      | 1.234 to 2.038  | < 0.001 | 1.255        | 0.879 to 1.791  | 0.212   |
| N2 (vs. N0 or N1)                    | 6.236      | 2.394 to 16.244 | < 0.001 | 2.538        | 0.645 to 9.996  | 0.183   |
| Stage II or III (vs. stage I)        | 6.111      | 2.261 to 16.518 | < 0.001 | 1.163        | 0.235 to 5.757  | 0.853   |
| Visceral pleural invasion            | 2.215      | 0.715 to 6.862  | 0.168   |              |                 |         |
| Angiolymphatic invasion              | 6.789      | 2.359 to 19.536 | < 0.001 | 3.599        | 1.126 to 11.507 | 0.031   |
| Acinar predominant                   | 0.561      | 0.198 to 1.589  | 0.276   |              |                 |         |
| Papillary predominant                | 0.376      | 0.086 to 1.653  | 0.195   |              |                 |         |
| Micropapillary predominant           | 1.231      | 0.350 to 4.329  | 0.746   |              |                 |         |
| Solid predominant                    | 6.987      | 2.675 to 18.245 | < 0.001 | 2.929        | 0.958 to 8.954  | 0.059   |

HR, Hazard ratio; CI, confidence interval. \*The HR associated with age is that the increase in hazard is associated with a 1-year increase in age. †The HR associated with tumor size is associated with a 1-cm increase in size.

**Table 4: Univariate and multivariate analyses of specific organ sites metastasis-free survival in patients of resected lung adenocarcinoma**

| Variables                                          | Univariate |                 |         | Multivariate |                 |         |
|----------------------------------------------------|------------|-----------------|---------|--------------|-----------------|---------|
|                                                    | HR         | 95% CI          | P value | HR           | 95% CI          | P value |
| <b>Contralateral lung metastasis-free survival</b> |            |                 |         |              |                 |         |
| Age*                                               | 0.999      | 0.974 to 1.025  | 0.938   | 1.002        | 0.973 to 1.032  | 0.904   |
| Female                                             | 1.314      | 0.743 to 2.324  | 0.348   | 1.337        | 0.728 to 2.455  | 0.349   |
| Tumor size†                                        | 1.678      | 1.443 to 1.950  | < 0.001 | 1.293        | 1.061 to 1.576  | 0.011   |
| N2 (vs. N0 or N1)                                  | 5.110      | 2.828 to 9.234  | < 0.001 | 1.373        | 0.634 to 2.972  | 0.421   |
| Stage II or III (vs. stage I)                      | 6.228      | 3.481 to 11.145 | < 0.001 | 2.123        | 0.906 to 4.976  | 0.083   |
| Visceral pleural invasion                          | 2.053      | 1.068 to 3.948  | 0.031   | 0.991        | 0.475 to 2.067  | 0.981   |
| Angiolymphatic invasion                            | 4.089      | 2.313 to 7.228  | < 0.001 | 1.796        | 0.924 to 3.490  | 0.084   |
| Acinar predominant                                 | 0.446      | 0.228 to 0.875  | 0.019   | 0.461        | 0.216 to 0.986  | 0.046   |
| Papillary predominant                              | 1.161      | 0.624 to 2.160  | 0.637   |              |                 |         |
| Micropapillary predominant                         | 2.789      | 1.532 to 5.077  | 0.001   | 1.115        | 0.560 to 2.221  | 0.757   |
| Solid predominant                                  | 1.725      | 0.808 to 3.684  | 0.159   |              |                 |         |
| Adjuvant therapy                                   | 4.350      | 2.338 to 8.093  | < 0.001 | 1.667        | 0.760 to 3.655  | 0.202   |
| <b>Brain metastasis-free survival</b>              |            |                 |         |              |                 |         |
| Age*                                               | 0.993      | 0.970 to 1.015  | 0.520   | 0.996        | 0.971 to 1.022  | 0.783   |
| Female                                             | 1.085      | 0.649 to 1.816  | 0.755   | 1.035        | 0.582 to 1.841  | 0.907   |
| Tumor size†                                        | 1.498      | 1.304 to 1.721  | < 0.001 | 1.176        | 0.974 to 1.420  | 0.092   |
| N2 (vs. N0 or N1)                                  | 3.701      | 2.138 to 6.408  | < 0.001 | 1.485        | 0.725 to 3.043  | 0.280   |
| Stage II or III (vs. stage I)                      | 4.823      | 2.865 to 8.121  | < 0.001 | 1.795        | 0.803 to 4.009  | 0.154   |
| Visceral pleural invasion                          | 1.892      | 1.051 to 3.407  | 0.034   | 1.177        | 0.620 to 2.235  | 0.618   |
| Angiolymphatic invasion                            | 4.679      | 2.759 to 7.934  | < 0.001 | 2.632        | 1.420 to 4.879  | 0.002   |
| Acinar predominant                                 | 0.758      | 0.442 to 1.301  | 0.315   |              |                 |         |
| Papillary predominant                              | 0.617      | 0.320 to 1.189  | 0.149   |              |                 |         |
| Micropapillary predominant                         | 3.021      | 1.729 to 5.279  | < 0.001 | 2.186        | 1.148 to 4.163  | 0.017   |
| Solid predominant                                  | 2.032      | 1.029 to 4.013  | 0.041   | 1.939        | 0.863 to 4.356  | 0.109   |
| Adjuvant therapy                                   | 2.540      | 1.511 to 4.270  | < 0.001 | 0.698        | 0.345 to 1.410  | 0.316   |
| <b>Bone metastasis-free survival</b>               |            |                 |         |              |                 |         |
| Age*                                               | 1.000      | 0.977 to 1.023  | 0.990   | 0.992        | 0.968 to 1.018  | 0.556   |
| Female                                             | 0.598      | 0.355 to 1.007  | 0.053   | 0.571        | 0.329 to 0.990  | 0.046   |
| Tumor size†                                        | 1.593      | 1.408 to 1.802  | < 0.001 | 1.268        | 1.071 to 1.501  | 0.006   |
| N2 (vs. N0 or N1)                                  | 4.694      | 2.774 to 7.942  | < 0.001 | 1.497        | 0.754 to 2.973  | 0.249   |
| Stage II or III (vs. stage I)                      | 5.431      | 3.211 to 9.186  | < 0.001 | 1.696        | 0.770 to 3.733  | 0.190   |
| Visceral pleural invasion                          | 2.644      | 1.404 to 4.977  | 0.003   | 1.497        | 0.758 to 2.954  | 0.245   |
| Angiolymphatic invasion                            | 5.791      | 3.397 to 9.874  | < 0.001 | 2.993        | 1.642 to 5.454  | < 0.001 |
| Acinar predominant                                 | 0.661      | 0.380 to 1.149  | 0.143   |              |                 |         |
| Papillary predominant                              | 0.761      | 0.411 to 1.407  | 0.383   |              |                 |         |
| Micropapillary predominant                         | 2.048      | 1.139 to 3.683  | 0.017   | 1.324        | 0.683 to 2.567  | 0.406   |
| Solid predominant                                  | 2.712      | 1.491 to 4.934  | 0.001   | 1.585        | 0.799 to 3.146  | 0.188   |
| Adjuvant therapy                                   | 3.357      | 1.961 to 5.747  | < 0.001 | 1.072        | 0.541 to 2.124  | 0.843   |
| <b>Liver metastasis-free survival</b>              |            |                 |         |              |                 |         |
| Age*                                               | 0.994      | 0.950 to 1.040  | 0.803   | 0.983        | 0.935 to 1.035  | 0.518   |
| Female                                             | 0.357      | 0.113 to 1.124  | 0.078   | 0.422        | 0.126 to 1.408  | 0.160   |
| Tumor size†                                        | 1.601      | 1.234 to 2.077  | < 0.001 | 1.242        | 0.846 to 1.823  | 0.268   |
| N2 (vs. N0 or N1)                                  | 5.027      | 1.784 to 14.169 | 0.002   | 2.986        | 0.625 to 14.263 | 0.170   |
| Stage II or III (vs. stage I)                      | 4.130      | 1.458 to 11.697 | 0.008   | 0.576        | 0.093 to 3.551  | 0.552   |
| Visceral pleural invasion                          | 1.798      | 0.572 to 5.649  | 0.315   |              |                 |         |
| Angiolymphatic invasion                            | 5.794      | 1.975 to 16.996 | 0.001   | 3.699        | 1.117 to 12.246 | 0.032   |
| Acinar predominant                                 | 0.577      | 0.183 to 1.817  | 0.348   |              |                 |         |
| Papillary predominant                              | 0.418      | 0.094 to 1.855  | 0.251   |              |                 |         |
| Micropapillary predominant                         | 0.943      | 0.211 to 4.212  | 0.939   |              |                 |         |
| Solid predominant                                  | 7.390      | 2.676 to 20.407 | < 0.001 | 4.093        | 1.340 to 12.504 | 0.013   |
| Adjuvant therapy                                   | 3.289      | 1.122 to 9.647  | 0.030   | 1.556        | 0.412 to 5.872  | 0.514   |

HR, Hazard ratio; CI, confidence interval. \*The HR associated with age is that the increase in hazard is associated with a 1-year increase in age. †The HR associated with tumor size is associated with a 1-cm increase in size.

(HR, 4.093; 95% CI, 1.340 to 12.504;  $P = 0.013$ ) was a significantly worse prognostic factor in multivariate analysis (Figure 1C).

### **Application of the number of risk factors in predicting organ-specific metastasis in patients with stage I lung adenocarcinoma**

To examine their cumulative predictive value on brain metastasis in stage I lung adenocarcinoma, micropapillary subtype predominant and angiolymphatic invasion were used as risk predictors for brain metastasis. All stage I patients ( $n = 556$ ) were divided into two groups according to number of positive risk predictors: none positive or one positive (group 1) ( $n = 541$ ), and two positive (group 2) ( $n = 15$ ). Kaplan-Meier analysis showed that patients with both micropapillary subtype predominant and angiolymphatic invasion had significantly worse BrMFS than others ( $P < 0.001$ ) (Figure 2A).

To examine their cumulative predictive value on liver metastasis in stage I lung adenocarcinoma, solid subtype predominant and angiolymphatic invasion were used as risk predictors for liver metastasis. All stage I patients ( $n = 556$ ) were divided into two groups according to number of positive risk predictors: none positive or one positive (group 1) ( $n = 540$ ), and two positive (group 2) ( $n = 16$ ). Kaplan-Meier analysis showed that patients with both solid subtype predominant and angiolymphatic invasion had significantly worse LMFS than others ( $P < 0.001$ ) (Figure 2B).

### **Logistic regression analysis for organ sites of distant metastasis in the validation cohort**

The median follow-up time for all the 438 patients in the validation cohort was 23.5 months (range, 0.1 to 37.8 months). For all these patients, the 3-year overall survival and disease-free survival rates were 96.0% and 94.0%, respectively. Twenty-two (5.0%) of the 438 patients developed distant metastasis during follow-up. Among the 22 patients with distant metastasis, there were 6 (27.3%) patients with acinar predominant, 2 (9.1%) with papillary predominant, 4 (18.2%) with micropapillary predominant, and 10 (45.5%) with solid predominant adenocarcinoma. The median time to recurrence for the 22 patients was 12.0 months (range,  $3.3 \pm 29.3$  months). Among the 22 patients, 9 (40.9%) patients developed contralateral lung metastasis, 7 (31.8%) had brain metastasis, 8 (36.4%) had bone metastasis, and 3 (13.6%) had liver metastasis during follow-up. Eleven (50.0%) of the 22 patients had local recurrence.

We first performed univariate logistic regression analyses for specific organ sites of distant metastasis in the validation cohort (Supplementary Table 1). The backward stepwise regression procedure was used for multivariate analysis (Supplementary Table 2). N2 (vs. N0 or N1)

( $P < 0.001$ ) was significantly associated with more contralateral lung metastasis in multivariate analysis. N2 (vs. N0 or N1) ( $P = 0.003$ ) and micropapillary subtype predominant (HR, 8.035; 95% CI, 1.025 to 63.005;  $P = 0.047$ ) were significantly associated with more brain metastasis. Stage II or III (vs. stage I) ( $P = 0.014$ ) was significantly associated with more bone metastasis. Solid subtype predominant ( $P = 0.025$ ) was significantly associated with more liver metastasis in univariate analysis. Multivariate analysis was not performed for liver metastasis due to the small number of patients with liver metastasis ( $n = 3$ ).

## **DISCUSSION**

This study demonstrated that pathological subtypes of lung adenocarcinoma are associated with organ-specific metastasis in patients of resected lung adenocarcinoma with distant metastasis. Acinar, micropapillary, and solid predominant adenocarcinomas are significantly associated with contralateral lung metastasis, brain metastasis, and liver metastasis, respectively. Acinar, micropapillary and solid predominant adenocarcinomas are also significant prognostic factors for CLMFS, BrMFS and LMFS, respectively. By combination of risk factors, stage I patients with micropapillary subtype predominant and angiolymphatic invasion have significant worse BrMFS. Those with solid subtype predominant and angiolymphatic invasion have significant worse LMFS.

The new classification of lung adenocarcinoma proposed by IASLC/ATS/ERS in 2011 was a significant prognostic factor for survival and recurrence in lung adenocarcinoma [18–21]. In our previous study [23], we have demonstrated that patients with micropapillary or solid predominant adenocarcinoma had a significantly higher possibility of developing initial extrathoracic-only recurrence than other subtypes. While breast cancer molecular subtypes have been reported to predispose the site of distant metastases [12–14], whether the new classification of lung adenocarcinoma predicts organ-specific metastasis in completely resected lung adenocarcinoma remains unknown. In the current study, we showed that the new classification of lung adenocarcinoma is significantly associated with organ-specific metastasis in patients of resected lung adenocarcinoma with distant metastasis. Furthermore, we demonstrated the prognostic significance of the new classification in specific organ metastasis-free survival. Our study is the first to demonstrate the prognostic value of the new classification of lung adenocarcinoma for organ-specific metastasis in the literature.

The lung, brain and bone are the most common organ sites of metastasis in resected NSCLC [3–5, 15, 16]. In our previous study [5], bone was the most common site of single organ metastasis in patients with resected stage I NSCLC, followed by the brain. In the current study of resected stage I–III lung adenocarcinoma, contralateral

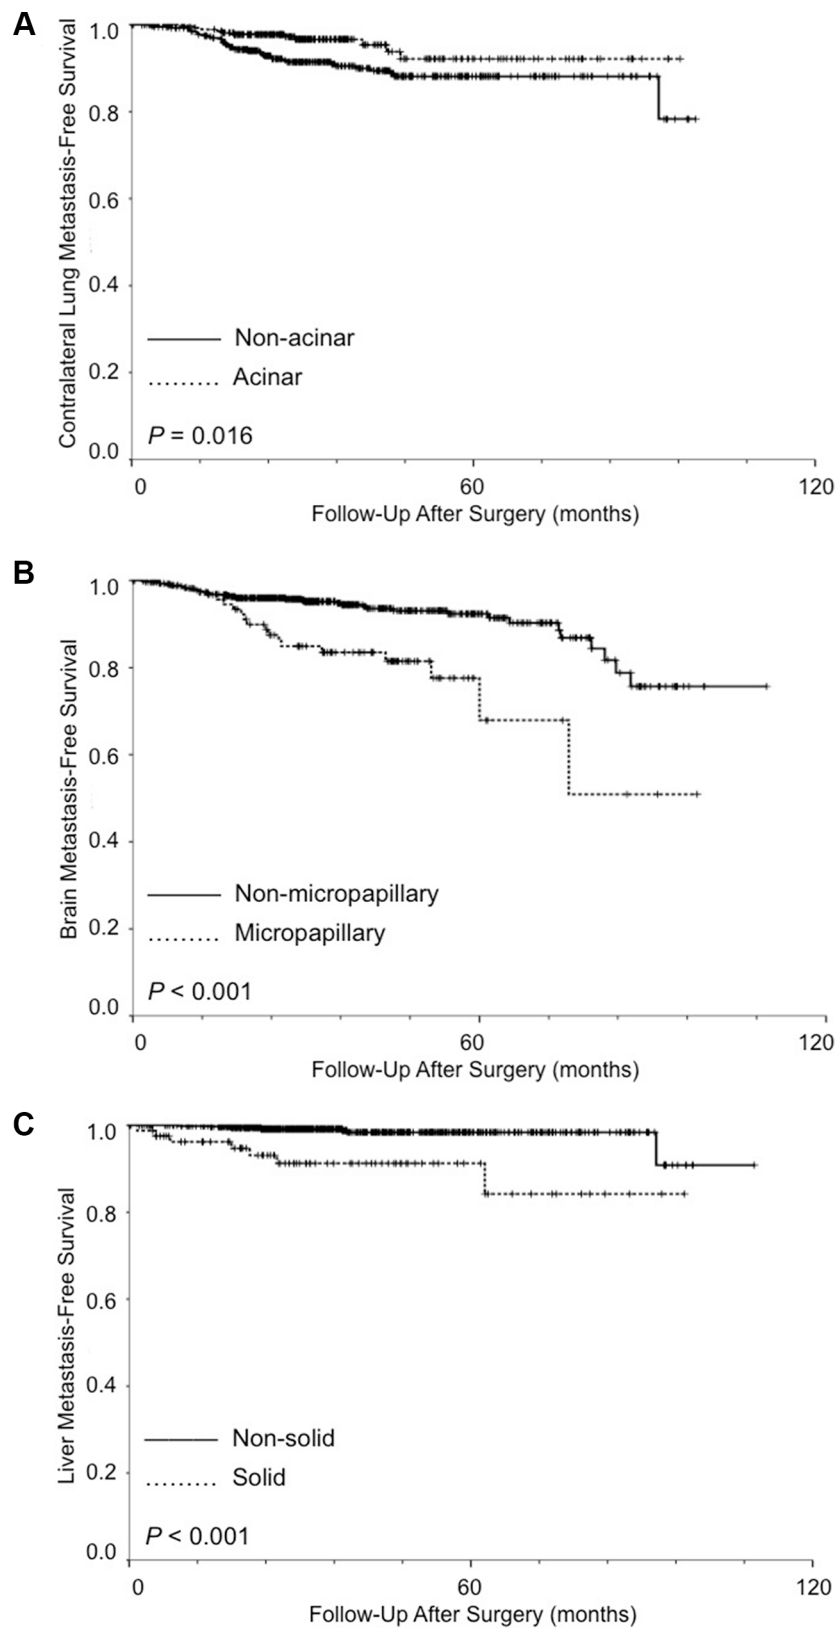

**Figure 1:** (A) Kaplan-Meier survival curves for contralateral lung metastasis-free survival stratified by acinar vs. non-acinar predominant adenocarcinoma. (B) Kaplan-Meier survival curves for brain metastasis-free survival stratified by micropapillary vs. non-micropapillary predominant adenocarcinoma. (C) Kaplan-Meier survival curves for liver metastasis-free survival stratified by solid vs. non-solid predominant adenocarcinoma. (Log-rank test).



lung was the most common site of metastasis, followed by the brain and the bone. We have demonstrated that acinar subtype predominant was associated with less contralateral lung metastasis, and was also a significant prognostic factor for better CLMFS. Approximately 10–25% of lung cancer patients have brain metastases at initial diagnosis [9]. About 40–50% of patients with lung cancer will develop brain metastases during the course of the disease [24, 25]. The brain is also one of the most common organ sites of metastasis in patients undergoing completely resected lung cancer [3–5, 12, 13]. Many biomarkers have been reported to be predictive for the development of brain metastases from lung cancer [9–11]. Several studies have demonstrated

that brain metastases would be more frequent in patients with tumors harboring epidermal growth factor receptor (EGFR) mutations [26–28]. However, the numbers of patients were small in these studies, and were far too limited to make any firm conclusions. In our study, micropapillary predominant adenocarcinoma was significantly associated with more brain metastasis, and was a significant prognostic factor for worse BrMFS. For stage I lung adenocarcinoma, patients with both micropapillary subtype predominant and angiolymphatic invasion had significant worse BrMFS. Since our study is the first to demonstrate the association of the new classification of lung adenocarcinoma and organ-specific metastasis in the literature, we have

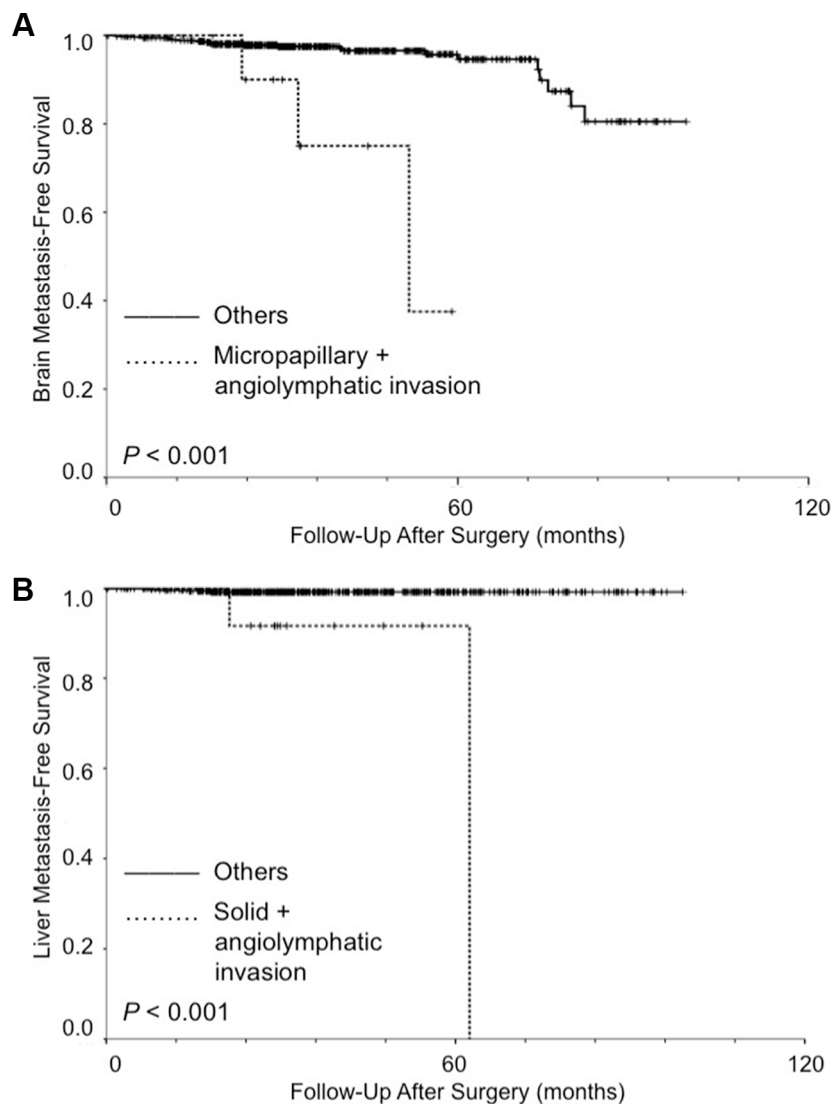

**Figure 2: Kaplan-Meier analysis (log-rank test) for organ-specific metastasis in patients with stage I lung adenocarcinoma.** (A) For brain metastasis, the patients were divided into two groups according to number of positive risk predictors (micropapillary subtype predominant and angiolymphatic invasion): none positive or one positive (group 1) ( $n = 541$ ), and two positive (group 2) ( $n = 15$ ). Patients with both micropapillary subtype predominant and angiolymphatic invasion had significantly worse brain metastasis-free survival than others ( $P < 0.001$ ). (B) For liver metastasis, the patients were divided into two groups according to number of positive risk predictors (solid subtype predominant and angiolymphatic invasion): none positive or one positive (group 1) ( $n = 540$ ), and two positive (group 2) ( $n = 16$ ). Patients with both solid subtype predominant and angiolymphatic invasion had significantly worse liver metastasis-free survival than others ( $P < 0.001$ ).

conducted a validation cohort for confirmation. Although the number of patients with metastasis is small and the follow-up time was short in the validation cohort, micropapillary predominant adenocarcinoma was still significantly associated with more brain metastasis. The information is important and helpful to identify patients of resected lung adenocarcinoma who are at higher risk developing brain metastases because brain metastasis without neurologic symptoms may be difficult to be early diagnosed.

Although liver was not a common organ site of metastasis in lung cancer, liver metastasis was not rare during follow-up after surgery. Approximately 9% of patients with distant metastasis developed liver metastasis in our study. The predictor of liver metastasis from lung cancer has not been reported. In the study, we have demonstrated that solid predominant adenocarcinoma tended to be significantly associated with a higher frequency of liver metastasis. Solid predominant adenocarcinoma was a significant prognostic factor for worse LMFS. For stage I lung adenocarcinoma, patients with both solid subtype predominant and angiolymphatic invasion had significantly worse LMFS. In the validation cohort, solid subtype predominant adenocarcinoma was significantly associated with more liver metastasis in univariate analysis. Although multivariate analysis was not performed due to the small number of patients with liver metastasis, the association between solid predominant adenocarcinoma and liver metastasis was worthy of further investigation in the future. The results are important because patients with solid predominant adenocarcinoma may undergo more frequently liver imaging study during follow-up for early diagnosis of liver metastasis.

The associations between age, sex, tumor size, N status, tumor stage, visceral pleural invasion, angiolymphatic invasion, or adjuvant therapy and organ site of metastasis from lung cancer have not been well demonstrated. In the current study, female is a significant prognostic factor for better BoMFS. Greater tumor size was associated with more contralateral lung, brain, and bone metastasis. Greater tumor size was also a significant prognostic factor for worse CLMFS and BoMFS. N2 status (vs. N0 or N1) was associated with more contralateral lung and bone metastasis. Stage II or III (vs. stage I) was associated with more contralateral lung and brain metastasis. Angiolymphatic invasion was associated with more brain, bone, and liver metastasis. Angiolymphatic invasion was also a significant prognostic factor for worse BrMFS and BoMFS. No significant association between other conventional clinicopathological variables and organ sites of metastasis was identified.

There are some limitations and biases of this study that should be mentioned. As a retrospective single institute study, patient selection bias and time trend bias were inevitable. Another limitation is the diagnostic bias that conventional imaging would not necessarily detect

all metastatic disease. Subclinical metastases may be missed simply because imaging not performed. There was also bias in defining a new primary lung cancer from a recurrent NSCLC. The major strength of this study is that a full and detailed follow-up of organ-specific metastasis made the analyses for specific organ site metastasis-free survival possible. Furthermore, we have conducted a validation cohort for internal validation. However, prospective multi-institutional studies are mandatory to further validate the prognostic value of the predominant pathological subtypes of lung adenocarcinoma on organ-specific metastasis after surgical resection.

In conclusion, this study demonstrates significant differences in metastatic behavior between predominant pathological subtypes of lung adenocarcinoma. Acinar predominant adenocarcinoma is associated with less contralateral lung metastasis. Micropapillary and solid predominant adenocarcinomas are significantly associated with brain and bone metastasis, respectively. This information is important for patient follow-up strategy and further study of molecular mechanisms leading to organ-specific metastasis in lung adenocarcinoma.

## **MATERIALS AND METHODS**

This study has been approved by the Institutional Review Board of Taipei Veterans General Hospital. From January 2004 to December 2012, all patients underwent completely resection for lung adenocarcinomas at Taipei Veterans General Hospital were retrospectively reviewed. Patients undergoing neoadjuvant chemotherapy or with stage IV disease were excluded. Patients with incomplete clinical information and follow-up were also excluded. A total of 801 patients were eligible for the study. Among them, 566 (70.7%) patients were free of tumor recurrence and 235 (29.3%) patients developed recurrence during follow-up. Only two patients with recurrence were diagnosed as lepidic predominant adenocarcinoma. The number of patients of lepidic predominant adenocarcinoma developing recurrence was small as compared with the other four subtypes of adenocarcinoma. Therefore, the 2 patients with lepidic predominant adenocarcinoma were excluded. Fifty-one (21.9%) of the remained 233 patients developed local only recurrence during follow-up, and was excluded for analysis. The remained 182 patients developed distant metastasis during follow-up. The 182 patients with distant metastasis and the 566 patients without tumor recurrence were included for analysis in the current study. The preoperative staging work-up was routinely performed as previously described [22, 23]. Mediastinoscopy was performed only when enlarged mediastinal lymph nodes (diameter > 1.0 cm) were shown by computed tomography scan. Complete resection of lung cancer and mediastinal lymph nodes dissection/sampling were performed as previously described [22, 23]. Determination of disease stages was based on the TNM

classification (seventh edition) of the American Joint Committee on Cancer and the International Union Against Cancer [29, 30].

All resected specimens were formalin fixed and stained with hematoxylin and eosin, and were evaluated microscopically as previously described [23]. Each tumor was reviewed using comprehensive histological subtyping, recording the percentage of each histologic component (lepidic, acinar, papillary, micropapillary, and solid) in 5% increments as previously described [23]. The predominant pattern is defined according to the most dominant pattern.

All patients were followed-up at our outpatient department quarterly in the first 2 years after resection and semi-annually thereafter. The modalities and protocols during follow-up were used as previously described [5, 22, 23]. Computed tomography scans of chest and upper abdomen were routinely done in every scheduled outpatient department visit for follow-up. Nuclear medicine survey of the bone was arranged every 6 months in the first 2 years after resection and annually thereafter during follow-up. Suspicious bony lesions were confirmed by x-ray or bone biopsy. Computed tomography scan of brain was done when neurological symptoms occurred or when clinical suspicions were raised. Once a metastasis was discovered, a routine investigation was arranged to look for other metastatic sites. After initial diagnosis of recurrence, further examinations were arranged to discover other metastatic sites if symptoms occurred or clinical suspicions were raised. The hospital charts of all patients were reviewed to collect data of patterns of recurrence, organ sites of recurrence, and treatment for recurrence. Data collected from telephone call and correspondence letters during follow-up were also included.

To investigate their impact on specific organ site metastasis-free survival, clinicopathologic factors were examined in univariate and multivariate analyses. Local recurrence was defined as tumor recurrence in contiguous anatomical sites, including the ipsilateral hemithorax and mediastinum after surgical resection. Distant metastasis was defined as tumor recurrence in the contralateral lung or outside the hemithorax and mediastinum after surgical resection. Local only recurrence was defined as only local recurrence identified from initial operation to death or last follow-up. Distant only metastasis was defined as only distant metastasis discovered from initial operation to death or last follow-up. Secondary primary lung cancer was differentiated from recurrent NSCLC in patients undergoing surgical resection or biopsy according to the criteria proposed by Girard et al [31]. For those not undergoing resection or biopsy, judgment was made according to clinical course, eg. progression or aggressive clinical behavior (multiple lesions). The length of specific organ site (contralateral lung, brain, bone, or liver) metastasis-free survival was defined as the interval between the date of surgical resection and the date of the specific organ site metastasis (contralateral lung, brain,

bone, or liver, respectively) or the last follow-up. An observation was censored at the last follow-up session when the patient was alive with specific organ metastasis-free status, or had died without specific organ metastasis.

To confirm the findings of the study, we conducted a validation cohort for further verification. From January 2013 to December 2014, all patients underwent completely resection for lung adenocarcinomas at Taipei Veterans General Hospital were retrospectively reviewed. The same exclusion criteria used in the original cohort were applied in the validation cohort. A total of 438 patients were eligible. Among them, 416 (95.0%) patients were free of tumor recurrence and 22 (5.0%) patients developed distant metastasis during follow-up.

The specific organ site metastasis-free survival was calculated by the Kaplan-Meier method [32]. The log-rank test was used to make group comparisons. To compare between groups with respect to categorical and continuous variables, the  $\chi^2$  test and the paired independent sample *t*-test were used as appropriate. To investigate their association with specific organ sites of metastasis, clinicopathological factors were analyzed in univariate and multivariate logistic regression. For specific organ site metastasis-free survival, univariate and multivariate analyses were performed by means of the Cox proportional hazards model using SPSS software (version 20; IBM, Armonk, New York, USA). All variables with  $P < 0.1$  in univariate analysis were entered into multivariate analysis. Age and sex were also entered for mutual adjustment despite  $P > 0.1$ . Statistical significance was defined as  $P < 0.05$ .

## ACKNOWLEDGMENTS

The authors are grateful to Drs Yi-Chen Yeh, Han-Shui Hsu, Chih-Cheng Hsieh, and Chien-Sheng Huang of Taipei Veterans General Hospital and Dr Liang-Shun Wang of Shuang Ho Hospital, Taipei, Taiwan for contribution to this article. They also thank Dr Ying-Shiun Kao and Mr Jung-Hsing Lin for their assistance regarding in data collection.

## CONFLICTS OF INTEREST

None.

## FUNDING

This work was supported in part by Ministry of Science and Technology (MOST 104-2314-B-075-062 and 105-2314-B-010-042; J.-J.H.), Ministry of Education, Aiming for the Top University Plan (104AC-P659; J.-J.H.), Taipei Veterans General Hospital (V105C-188; J.-J.H.), Taipei Veterans General Hospital-National Yang-Ming University-Excellent Physician Scientists Cultivation

Program (104-V-B-005; J.-J.H.), Yen Tjing Ling Medical Foundation (CI-105-9; J.-J.H.), Li-Yang Sheen Medical Education Memorial Foundation (J.-J.H. and W.-H.H.), National Science Council (NSC 102-2628-B-075-003-MY3; Y.-C.W.), and MOHW103-TD-B-111-02 (Y.-C.W.).

## REFERENCES

1. Torre LA, Bray F, Siegel RL, Ferlay J, Lortet-Tieulent J, Jemal A. Global cancer statistics, 2012. *CA Cancer J Clin*. 2015; 65:87–108.
2. Ettinger DS, Wood DE, Akerley W, Bazhenova LA, Borghaei H, Camidge DR, Cheney RT, Chirieac LR, D'Amico TA, Demmy TL, Dilling TJ, Dobelbower MC, Govindan R, et al. Non-small cell lung cancer, version 6.2015. *J Natl Compr Canc Netw*. 2015; 13:515–524.
3. Yoshino I, Yohena T, Kitajima M, Ushijima C, Nishioka K, Ichinose Y, Sugimachi K. Survival of non-small cell lung cancer patients with postoperative recurrence at distant organs. *Ann Thorac Cardiovasc Surg*. 2001; 7:204–209.
4. Hung JJ, Hsu WH, Hsieh CC, Huang BS, Huang MH, Liu JS, Wu YC. Post-recurrence survival in completely resected stage I non-small cell lung cancer with local recurrence. *Thorax*. 2009; 64:192–196.
5. Hung JJ, Jeng WJ, Hsu WH, Wu KJ, Chou TY, Hsieh CC, Huang MH, Liu JS, Wu YC. Prognostic factors of post-recurrence survival in completely resected stage I non-small cell lung cancer with distant metastasis. *Thorax*. 2010; 65:241–245.
6. Paget S. The distribution of secondary growths in cancer of the breast. *Lancet*. 1889; 1:571–573.
7. Fidler IJ. The pathogenesis of cancer metastasis: the ‘seed and soil’ hypothesis revisited. *Nat Rev Cancer*. 2003; 3:453–458.
8. Vanharanta S, Massagué J. Origins of Metastatic Traits. *Cancer Cell*. 2013; 24:410–421.
9. Saad AG, Yeap BY, Thunnissen FB, Pinkus GS, Pinkus JL, Loda M, Sugarbaker DJ, Johnson BE, Chirieac LR. Immunohistochemical markers associated with brain metastases in patients with non-small cell lung carcinoma. *Cancer*. 2008; 113:2129–2138.
10. Huang Q, Ouyang X. Predictive biochemical-markers for the development of brain metastases from lung cancer. *Cancer Epidemiol*. 2013; 37:703–707.
11. Owonikoko TK, Arbiser J, Zelnak A, Shu HK, Shim H, Robin AM, Kalkanis SN, Whitsett TG, Salhia B, Tran NL, Ryken T, Moore MK, Egan KM, et al. Current approaches to the treatment of metastatic brain tumours. *Nat Rev Clin Oncol*. 2014; 11:203–222.
12. Kennecke H, Yerushalmi R, Woods R, Cheang MC, Voduc D, Speers CH, Nielsen TO, Gelmon K. Metastatic behavior of breast cancer subtypes. *J Clin Oncol*. 2010; 28:3271–3277.
13. Soni A, Ren Z, Hameed O, Chanda D, Morgan CJ, Siegal GP, Wei S. Breast Cancer Subtypes Predispose the Site of Distant Metastases. *Am J Clin Pathol*. 2015; 143:471–478.
14. Savci-Heijink CD, Halfwerk H, Hooijer GK, Horlings HM, Wesseling J, van de Vijver MJ. Retrospective analysis of metastatic behaviour of breast cancer subtypes. *Breast Cancer Res Treat*. 2015; 150:547–557.
15. Shimada Y, Saji H, Yoshida K, Kakihana M, Honda H, Nomura M, Usuda J, Kajiwara N, Ohira T, Ikeda N. Prognostic Factors and the Significance of Treatment After Recurrence in Completely Resected Stage I Non-small Cell Lung Cancer. *Chest*. 2013; 143:1626–1634.
16. Song IH, Yeom SW, Heo S, Choi WS, Yang HC, Jheon S, Kim K, Cho S. Prognostic factors for post-recurrence survival in patients with completely resected Stage I non-small-cell lung cancer. *Eur J Cardiothorac Surg*. 2014; 45:262–267.
17. Travis WD, Brambilla E, Noguchi M, Nicholson AG, Geisinger KR, Yatabe Y, Beer DG, Powell CA, Riely GJ, Van Schil PE, Garg K, Austin JH, Asamura H, et al. International Association for the Study of Lung Cancer/American Thoracic Society/European Respiratory Society international multidisciplinary classification of lung adenocarcinoma. *J Thorac Oncol*. 2011; 6:244–285.
18. Sica G, Yoshizawa A, Sima CS, Azzoli CG, Downey RJ, Rusch VW, Travis WD, Moreira AL. A grading system of lung adenocarcinomas based on histologic pattern is predictive of disease recurrence in stage I tumors. *Am J Surg Pathol*. 2010; 34:1155–1162.
19. Russell PA, Wainer Z, Wright GM, Daniels M, Conron M, Williams RA. Does lung adenocarcinoma subtype predict patient survival? A clinicopathologic study based on the new International Association for the Study of Lung Cancer/American Thoracic Society/European Respiratory Society international multidisciplinary lung adenocarcinoma classification. *J Thorac Oncol*. 2011; 6:1496–1504.
20. Yoshizawa A, Motoi N, Riely GJ, Sima CS, Gerald WL, Kris MG, Park BJ, Rusch VW, Travis WD. Impact of proposed IASLC/ATS/ERS classification of lung adenocarcinoma: Prognostic subgroups and implications for further revision of staging based on analysis of 514 stage I cases. *Mod Pathol*. 2011; 24:653–664.
21. Warth A, Muley T, Meister M, Stenzinger A, Thomas M, Schirmacher P, Schnabel PA, Budczies J, Hoffmann H, Weichert W. The Novel Histologic International Association for the Study of Lung Cancer/American Thoracic Society/European Respiratory Society Classification System of Lung Adenocarcinoma Is a Stage-Independent Predictor of Survival. *J Clin Oncol*. 2012; 30:1438–1446.
22. Hung JJ, Jeng WJ, Chou TY, Hsu WH, Wu KJ, Huang BS, Wu YC. Prognostic value of the New International Association for the Study of Lung Cancer/American Thoracic Society/European Respiratory Society Lung Adenocarcinoma Classification on Death and Recurrence in Completely Resected Stage I Lung Adenocarcinoma. *Ann Surg*. 2013; 258:1079–1086.

23. Hung JJ, Yeh YC, Jeng WJ, Wu KJ, Huang BS, Wu YC, Chou TY, Hsu WH. Predictive Value of the International Association for the Study of Lung Cancer/American Thoracic Society/European Respiratory Society Classification of Lung Adenocarcinoma in Tumor Recurrence and Patient Survival. *J Clin Oncol.* 2014; 32:2357–2364.
24. American Joint Committee on Cancer. *AJCC Cancer Staging Manual.* 7th ed. New York:Springer. 2010.
25. International Union Against Cancer. *TNM Classification of Malignant Tumours.* 7th ed. Oxford, UK: Wiley-Blackwell.2009.
26. Girard N, Deshpande C, Lau C, Finley D, Rusch V, Pao W, Travis WD. Comprehensive histologic assessment helps to differentiate multiple lung primary nonsmall cell carcinomas from metastases. *Am J Surg Pathol.* 2009; 33:1752–1764.
27. Kaplan EL, Meier P. Nonparametric estimation for incomplete observations. *J Am Stat Assoc.* 1958; 53:457–481.
28. Gril B, Evans L, Palmieri D, Steeg PS. Translational research in brain metastasis is identifying molecular pathways that may lead to the development of new therapeutic strategies. *Eur J Cancer.* 2010; 46:1204–1210.
29. Rahmathulla G, Toms SA, Weil RJ. The molecular biology of brain metastasis. *J Oncol.* 2012; 2012:723541.
30. Li Z, Lu J, Zhao Y, Guo H. The retrospective analysis of the frequency of EGFR mutations and efficacy of gefitinib in NSCLC patients with brain metastasis. *J Clin Oncol.* 2011; 29 (Suppl abstr e18065).
31. Heon S, Yeap BY, Britt GJ, Costa DB, Rabin MS, Jackman DM, Johnson BE. Development of central nervous system metastases in patients with advanced non-small cell lung cancer and somatic EGFR mutations treated with gefitinib or erlotinib. *Clin Cancer Res.* 2010; 16:5873–5882.
32. Eichler AF, Kahle KT, Wang DL, Joshi VA, Willers H, Engelman JA, Lynch TJ, Sequist LV. EGFR mutation status and survival after diagnosis of brain metastasis in non small cell lung cancer. *Neuro Oncol.* 2010; 12:1193–1199.
