# Supplementary material for: Factors predicting organ-specific distant metastasis in patients with completely resected lung adenocarcinoma
Source: PubMed Central journal article supplement (PMC5295429; doi:10.18632/oncotarget.11338), 2016-08-17
Supplement: oncotarget-07-58261-s001.pdf [file oncotarget-07-58261-s001.pdf]

## Factors predicting organ-specific distant metastasis in patients with completely resected lung adenocarcinoma

### Supplementary Materials

**Supplementary Table S1: Univariate analysis of association between clinicopathological variables and organ sites of metastasis in the validation cohort of patients with resected lung adenocarcinoma.** See Supplementary\_Table\_S1.

**Supplementary Table S2: Multivariate analysis of association between clinicopathological variables and organ sites of metastasis in the validation cohort of patients with resected lung adenocarcinoma**

| Variables                            | Univariate |                  |         |
|--------------------------------------|------------|------------------|---------|
|                                      | HR         | 95% CI           | P value |
| <b>Contralateral lung metastasis</b> |            |                  |         |
| N2 (vs. N0 or N1)                    | 29.185     | 6.917 to 123.146 | < 0.001 |
| <b>Brain metastasis</b>              |            |                  |         |
| N2 (vs. N0 or N1)                    | 11.638     | 2.256 to 60.028  | 0.003   |
| Micropapillary predominant           | 8.035      | 1.025 to 63.005  | 0.047   |
| Solid predominant                    | 5.598      | 0.811 to 38.631  | 0.081   |
| <b>Bone metastasis</b>               |            |                  |         |
| Stage II or III (vs. stage I)        | 5.918      | 1.442 to 24.294  | 0.014   |

HR, Hazard ratio; CI, confidence interval.
